# Supplementary material for: Focused ultrasound excites cortical neurons via mechanosensitive calcium accumulation and ion channel amplification
Source: PubMed Central journal article supplement (PMC8789820; doi:10.1038/s41467-022-28040-1), 2022-01-25
Supplement: 41467_2022_28040_MOESM1_ESM.pdf [file 41467_2022_28040_MOESM1_ESM.pdf]

## **Supplementary Information**

### **Focused ultrasound excites cortical neurons via mechanosensitive calcium accumulation and ion channel amplification**

**Sangjin Yoo<sup>1</sup>, David R. Mittelstein<sup>2</sup>, Robert Hurt<sup>3</sup>, Jerome Lacroix<sup>1,4</sup>, Mikhail G. Shapiro<sup>1\*</sup>**

<sup>1</sup>Division of Chemistry and Chemical Engineering, California Institute of Technology, Pasadena, CA 91125, USA

<sup>2</sup>Division of Engineering and Applied Science, California Institute of Technology, Pasadena, CA 91125, USA

<sup>3</sup>Division of Biology and Biological Engineering, California Institute of Technology, Pasadena, CA 91125, USA

<sup>4</sup>Graduate College of Biomedical Sciences, Western University of Health Sciences, 309 E. Second St, Pomona, CA 91766, USA

\*Correspondence should be addressed to M.G.S. (mikhail@caltech.edu)

**Supplementary Figures 1-11, Movie 1 and Tables 1-2**

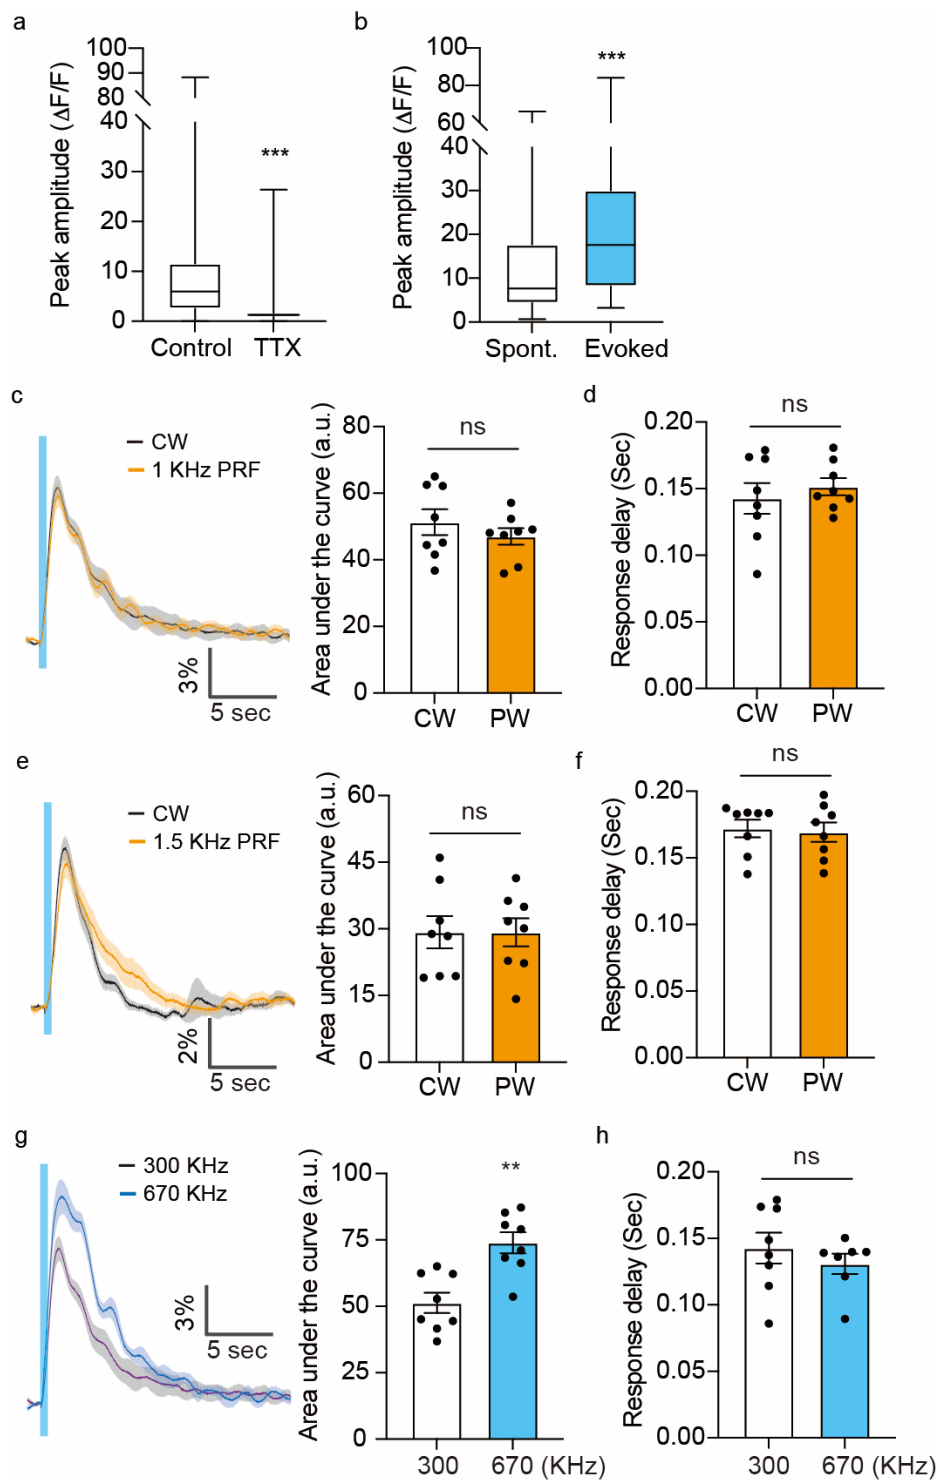

**Supplementary Figure 1 | Neuron stimulation with pulsed-wave and higher frequency of ultrasound.** (a) Comparison of peak amplitude of calcium response before and after TTX (Min/Max, Median within 50% volume,  $n=370$  (control), 429 (TTX), unpaired t-test, two-tailed,  $p<0.0001$ ). (b) Comparison of peak amplitude of spontaneous calcium activity and evoked calcium response to ultrasound (Min/Max, Median within 50% volume,  $n=519$ , unpaired t-test, two-tailed,  $p<0.0001$ ). (c) Comparison of calcium response to pulsed (1 KHz PRF) and continuous (CW) ultrasound ( $n=8$  independent experiments, unpaired t-test, two-tailed,  $p=0.3667$ ), and (d) their onset delay ( $n=8$  independent experiments, unpaired t-test, two-tailed,  $p=0.5139$ ). (e) Comparison of calcium response to pulsed (1.5 KHz PRF) and continuous (CW) ultrasound ( $n=8$  independent experiments, unpaired t-test, two-tailed,  $p=0.9969$ ), and (f) their onset delay ( $n=8$  independent experiments, unpaired t-test, two-tailed,  $p=0.7882$ ). (g) Comparison of calcium response with 300 and 670 KHz frequency of ultrasound ( $n=8$  independent experiments, unpaired t-test, two-tailed,  $p=0.0011$ ), and (h) their onset delay ( $n=8$  independent experiments, unpaired t-test, two-tailed,  $p=0.4202$ ). All values represent mean  $\pm$  SEM.

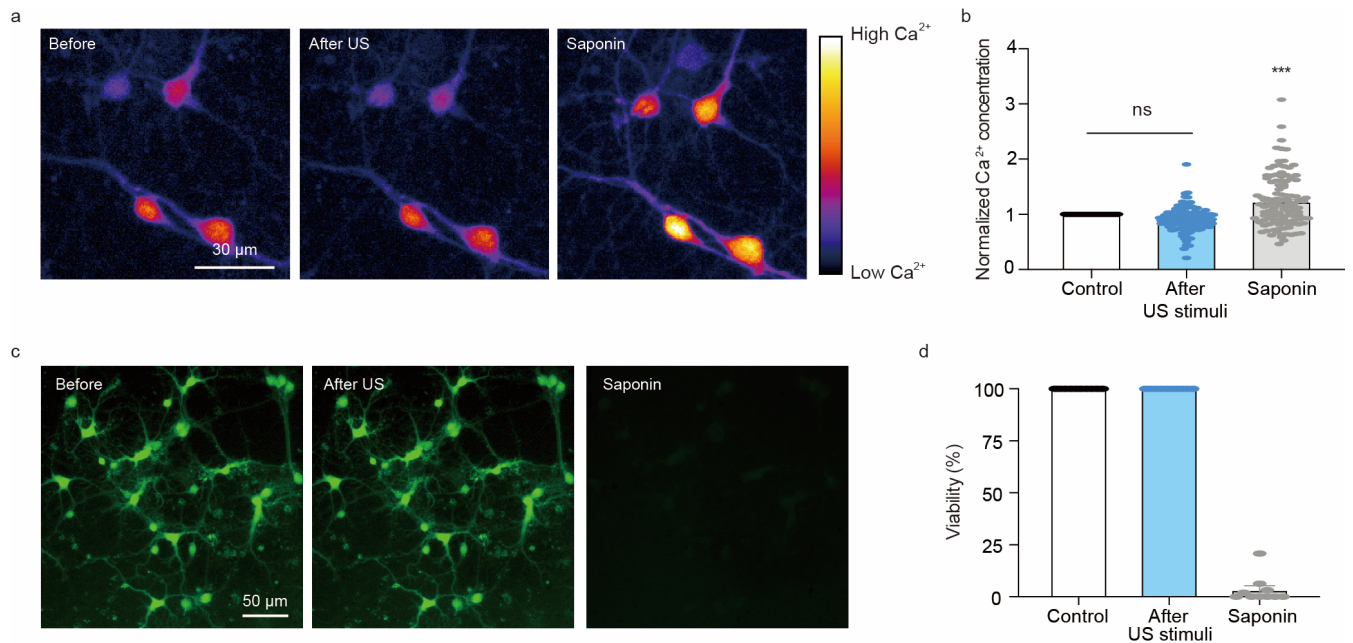

**Supplementary Figure 2 | Safety test at cellular level after ultrasound stimulation.** (a) Change of GCaMP6f baseline intensity before, after ultrasound stimuli (15 W/cm<sup>2</sup>, 30 times every 20 sec) and after membrane poration (saponin), and (b) their quantification (n=117 cells from 2 dish, one way ANOVA followed by Tukey's multiple comparison test, p=0.0587 (control vs after US)). (c) Live neuron images before and after US stimulation and saponin treatment (after 5 mins from 100  $\mu\text{g}/\text{ml}$  saponin treatment). And (d) quantification of neuron viability before and after the ultrasound stimuli and saponin treatment (n=10 ROI from 2 independent experiments). All values represent mean  $\pm$  SEM.

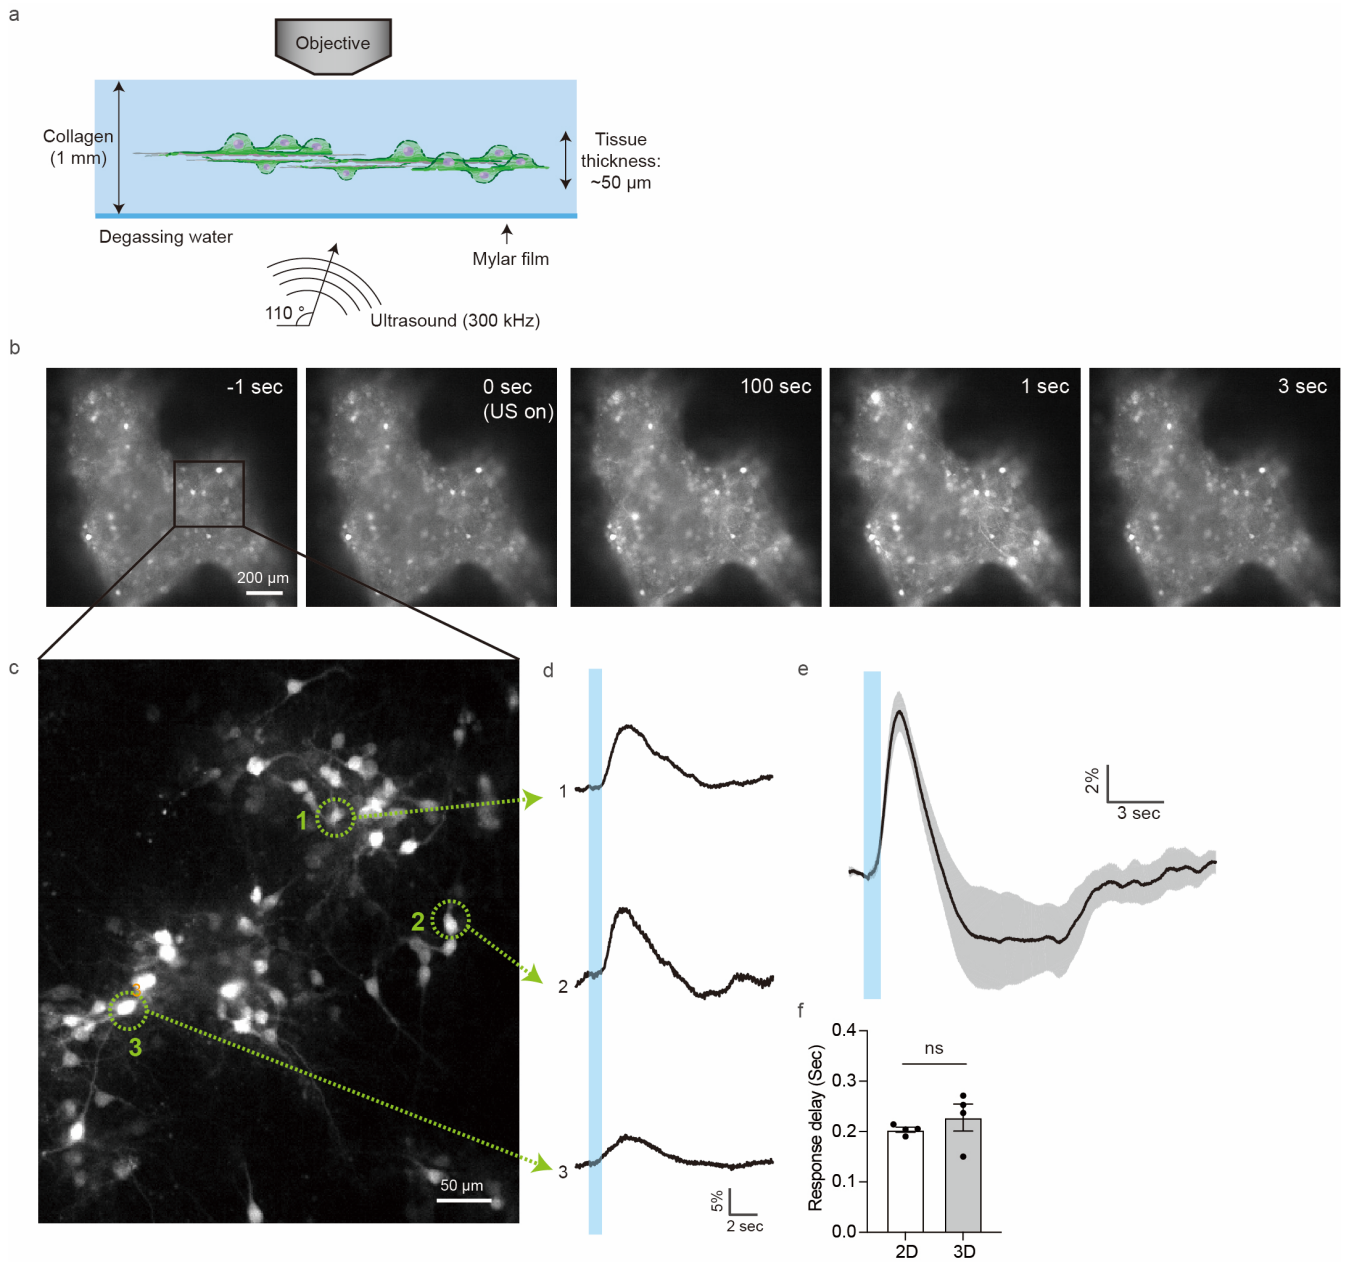

**Supplementary Figure 3 | Ultrasound stimulation to 3D neural tissue model embedded in collagen hydrogel.**

(a) Schematics of ultrasound stimulation to 3D collagen tissue model. (b) Time lapse images of calcium responses to ultrasound stimulation from the 3D cultured GCaMP6f neurons. (c) A snapshot of the 3D cultured GCaMP6f neurons and (d) Calcium responses from selected neurons. (e) Averaged calcium response ( $n=4$  independent experiments). (f) Quantification of response onset time ( $n=4$  independent experiments, Unpaired T-test, two-tailed,  $p=0.4083$ ). Mean trace is solid and SEM is shaded. All values represent mean  $\pm$  SEM.

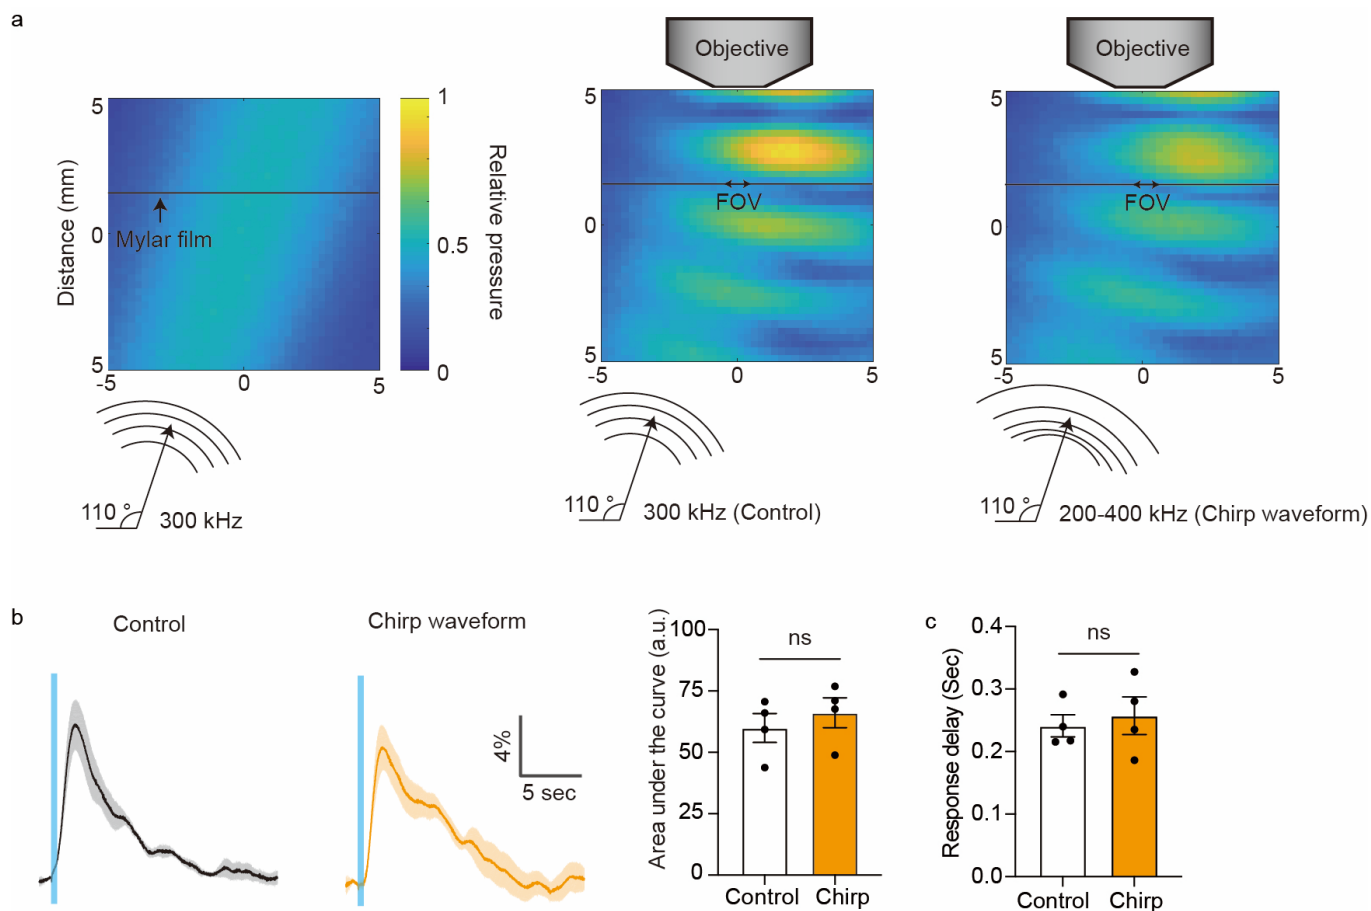

**Supplementary Figure 4 | Ultrasonic neuron stimulation with chirp waveform.** (a) Pressure profiles measured using a fiber optic hydrophone in three configurations. Left: deep underwater with no acoustic reflectors (i.e. “free field”) with 300 kHz ultrasound. Middle: air/water interface and microscope objective lens at same locations as used in fluorescent imaging studies with 300 kHz ultrasound. Right: same configuration as middle with chirp waveform (Ultrasound frequency linearly increasing from 200 to 400 kHz over 10  $\mu$ s, then linearly decreasing from 400 to 200 kHz over 10  $\mu$ s in a repeating pattern throughout the 500ms burst). Standing wave pattern produced by reflection off objective lens decreased with chirp waveform compared to control waveform. (b) Calcium responses to ultrasound with normal and chirp waveform and their quantifications (n= 4 independent experiments, Paired T test, two-tailed, p=0.4891). (c) Quantification of response onset time (n= 4 independent experiments, Unpaired T-test, two-tailed, p=0.6591). Mean trace is solid and SEM is shaded. All values represent mean  $\pm$  SEM.

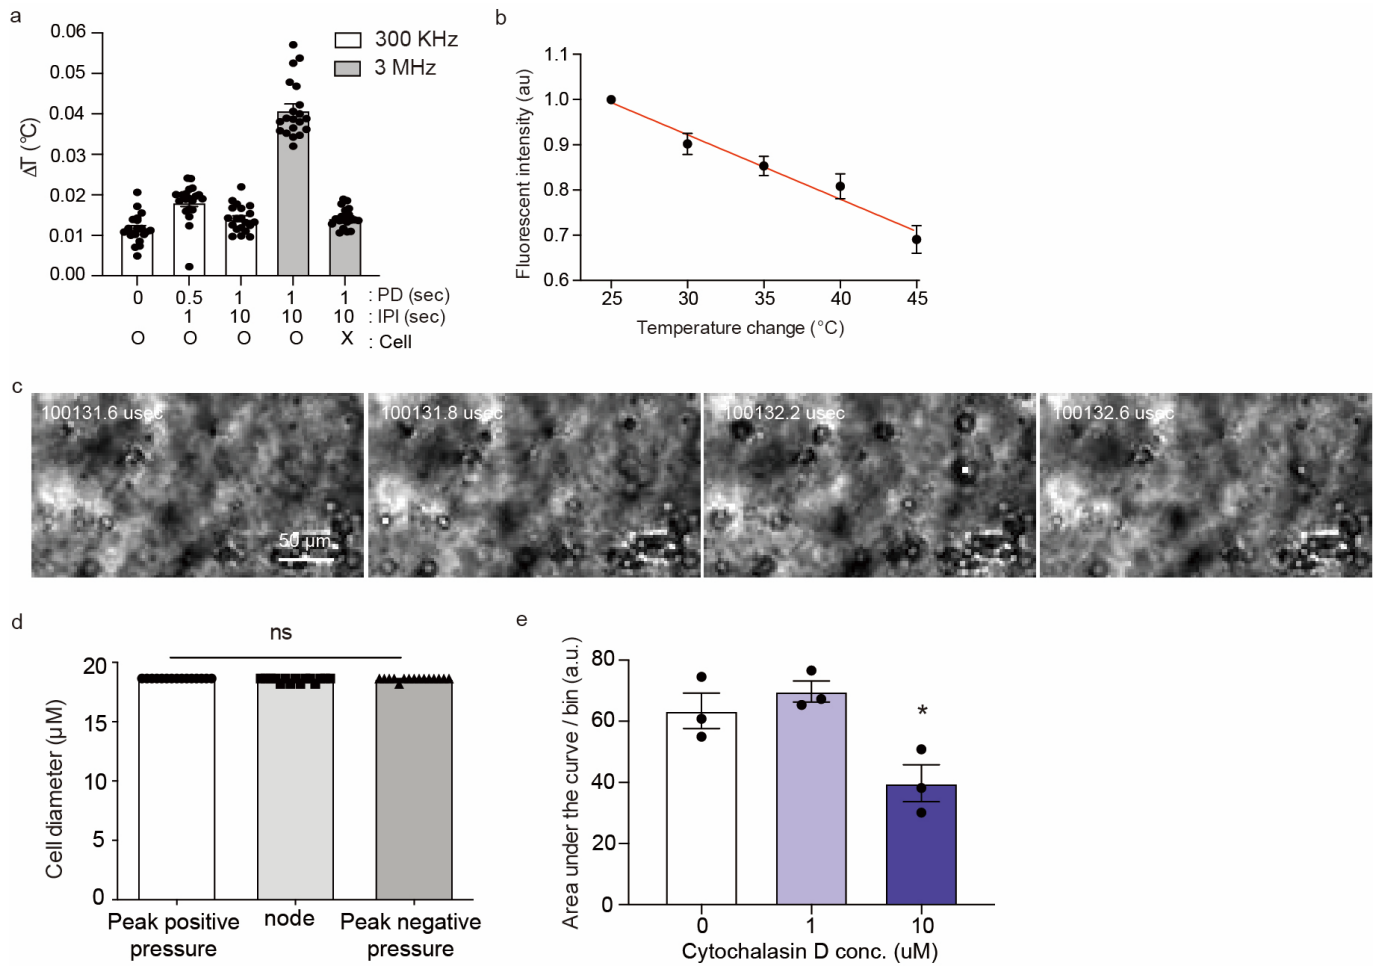

**Supplementary Figure 5 | Ultra-high-speed imaging of neuron** (a) Temperature measurement using an optic hydrophone near neurons during ultrasound stimulation with various parameters (n=20, 15 and 40 W/cm<sup>2</sup> intensities were used for 300 kHz and 3 MHz, respectively). (b) Fluorescence intensity of mCherry decreased as increasing the temperature (n=20, 2%/°C, R square=0.9240). (c) Ultra-high-speed imaging of microbubbles (bubble size=4 μm) while ultrasound stimulation. (d) Quantification of cell diameter change during ultrasound stimulation (n=15, Paired T test, two-tailed, p=0.3343). (e) Quantification of spontaneous activity before and after the actin depolymerization (bin =5 sec, n=3 independent experiments, Tukey's post comparison after one-way ANOVA, p=0.6859 (0 vs 1 μM)) with different concentrations of depolymerizers. All values represent mean ± SEM.

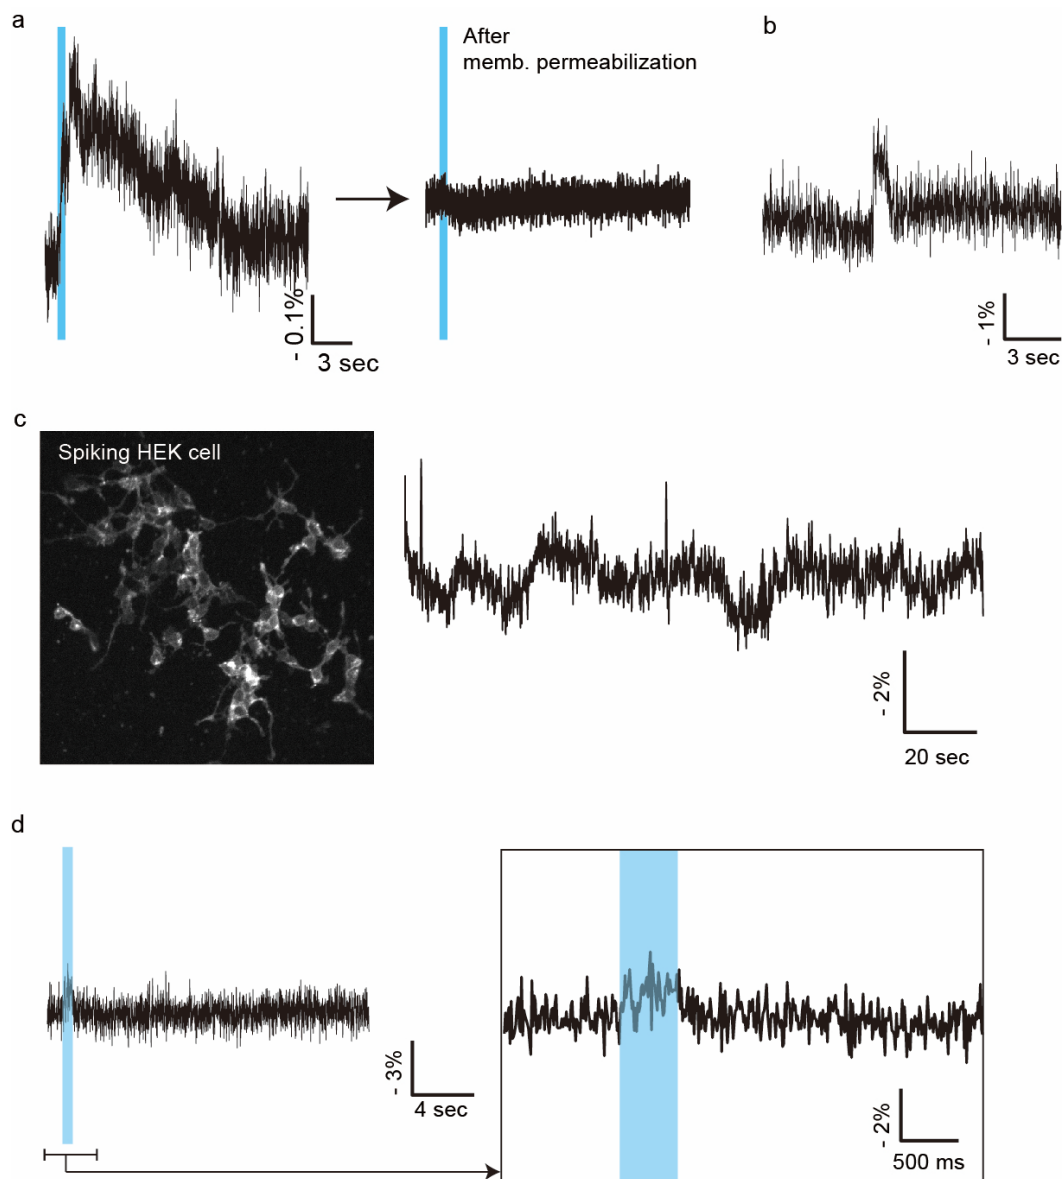

**Supplementary Figure 6 | Voltage imaging of cells** (a) Voltage responses to ultrasound ( $n=4$  independent experiments), and the responses disappeared after membrane permeabilization by saponin. (b) Spontaneous activity from Ace2N-expressing neurons in the absence of extracellular calcium.  $1\ \mu\text{M}$  bicuculine (GABA<sub>A</sub> blocker) was added to induce the hyper excitation ( $n=101$  from a dish). (c) Ace2N-expressing spiking HEK cells and their spontaneous activity  $n=52$  from a dish. (d) Voltage imaging of the spiking HEK cells during ultrasound stimulation,  $n=82$  cells from 2 independent experiments.

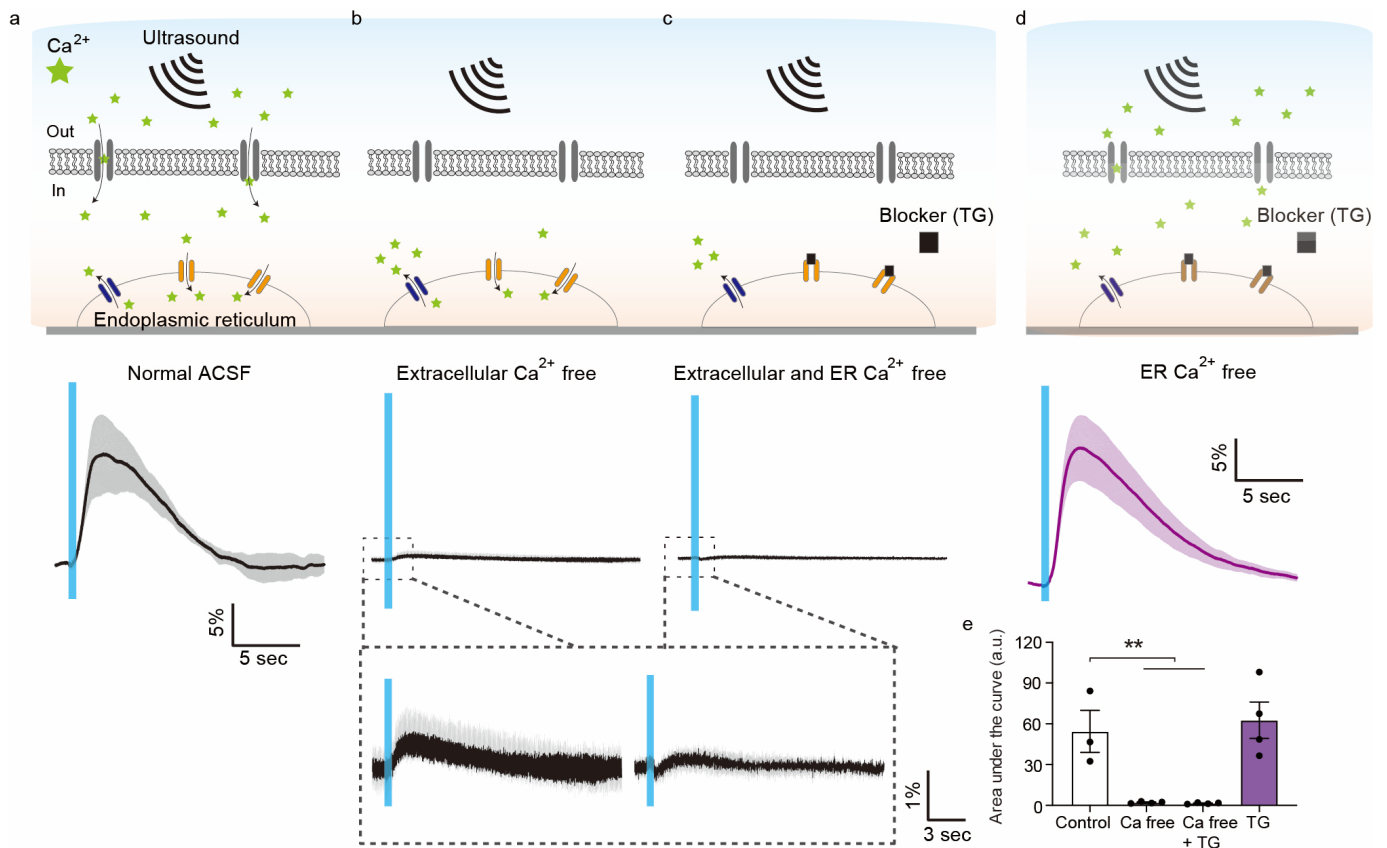

**Supplementary Figure 7 | Ultrasound stimulation triggers calcium release from endoplasmic reticulum.** (a) Calcium response to ultrasound stimulation in the presence of extra- and intercellular calcium (normal ACSF) (b) Calcium response to ultrasound stimulation in the absence of extracellular calcium (calcium free ACSF). (c) Calcium response to ultrasound stimulation in the absence of calcium in extracellular space and endoplasmic reticulum (calcium free ACSF + Thapsigargin). (d) Calcium response to ultrasound stimulation in the absence of calcium in endoplasmic reticulum (normal ACSF + Thapsigargin). (e) Quantification of area under the curve from each condition (n= 3 independent experiments for control, = 4 independent experiments for others, Unpaired t-test, two-tailed). Mean trace is solid and SEM is shaded. All values represent mean ± SEM.



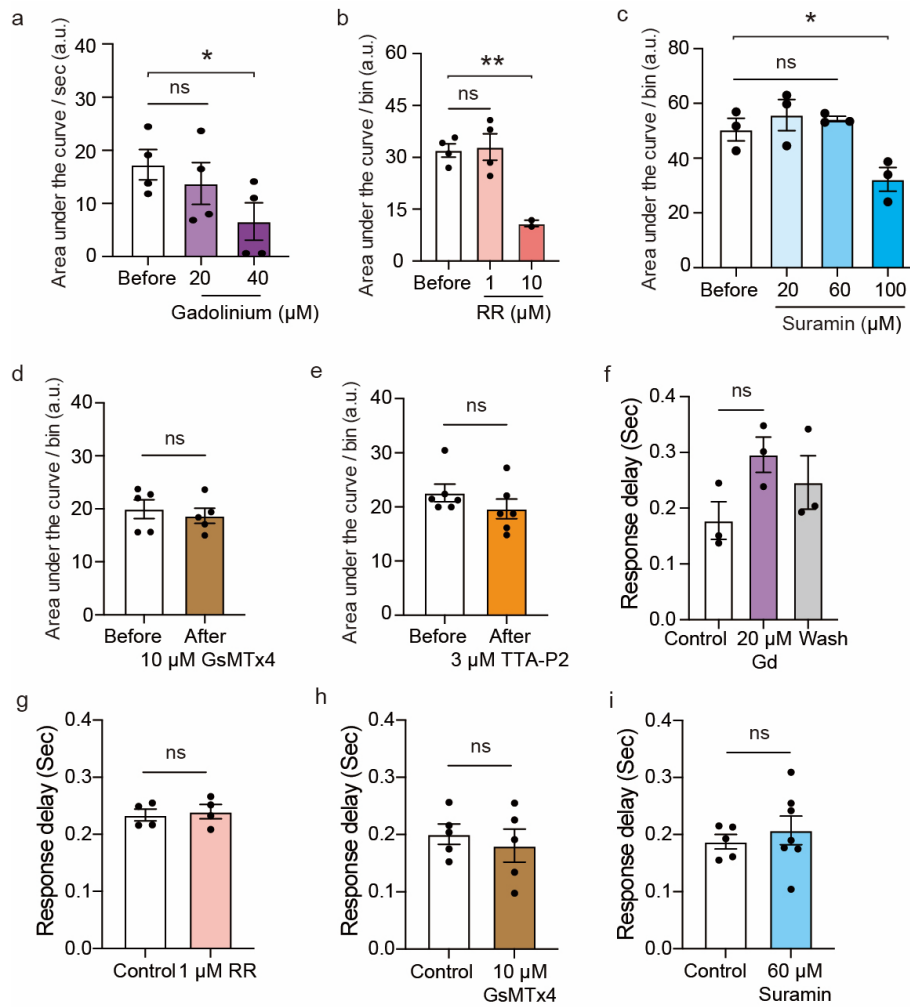

**Supplementary Figure 8 | Spontaneous activity changes before and after channel blocking.** (a) Spontaneous activity change after gadolinium treatment to block the global mechanosensitive channels ( $n=4$  independent experiments, Paired T-test, two-tailed,  $p=0.6258$  (control vs 20  $\mu\text{M}$ )). (b) Spontaneous activity change after ruthenium red treatment to block the TRPV1, 2 and 4 channels ( $n=4$  (1  $\mu\text{M}$ ) and 2 (10  $\mu\text{M}$ ) independent experiments, Paired T-test, two-tailed,  $p=0.8337$ ). (c) Spontaneous activity change after suramin treatment to inhibit the GPCRs ( $n=3$  independent experiments, Unpaired t-test, two-tailed,  $p=0.4167$  (control vs 60  $\mu\text{M}$ )). (d) Spontaneous activity change after GsMTx4 treatment to inhibit the Piezo1 and TRPC1 channels ( $n=5$  independent experiments, Unpaired t-test, two-tailed,  $p=0.6005$ ). (e) Spontaneous activity change after TTA-P2 treatment to block the t-type calcium channels ( $n=6$  independent experiments, Paired T-test, two-tailed,  $p=0.2546$ ). Quantification of response onset time after (f)  $\text{Gd}^{3+}$  ( $n=3$  independent experiments, Tukey's multiple comparison after One-way ANOVA,  $p=0.1553$  (Control vs. Gd)), (g) RR ( $n=4$  independent experiments, Unpaired T-test, two-tailed,  $p=0.7383$ ), GsMTx4 ( $n=5$  independent experiments, Unpaired T-test, two-tailed,  $p=0.5719$ ), Suramin treatment ( $n=5$  (control), 7 (suramin) independent experiments, Unpaired T-test, two-tailed,  $p=0.1183$ ). All values represent mean  $\pm$  SEM.

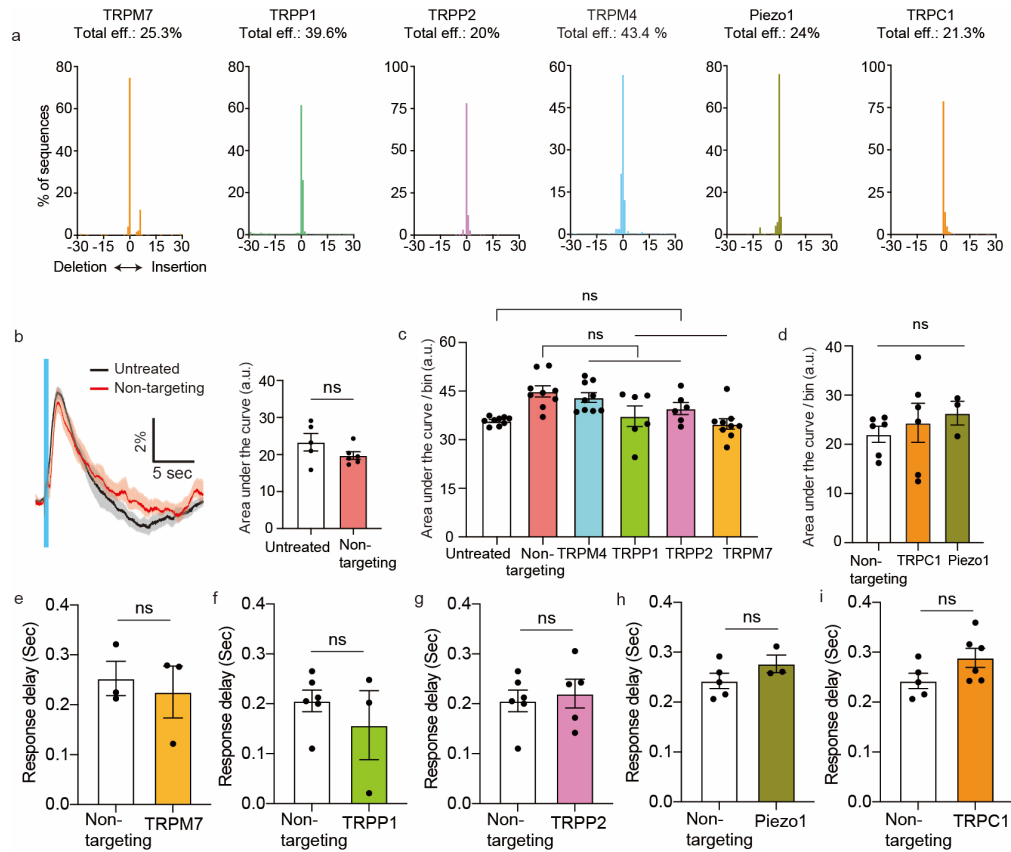

**Supplementary Figure 9 | CRISPR/Cas9 for knockdown specific mechanosensitive ion channel.** (a) CRISPR/Cas9 efficiencies for each targeted channel. (b) Calcium responses from wild type neurons and modified neurons (CRISPR/Cas9 with non-targeting sgRNA as a positive control (n= 5 independent experiments, Unpaired t-test, two-tailed,  $p=0.1720$ ). (c and d) Quantification of spontaneous activities after knock down of the target channels (Dunn's multiple comparison after one-way ANOVA, n= 9 (Untreated, Non-targeting, TRPM4, TRPM7), 6 (TRPP1, TRPP2) independent experiments.  $p=0.0821\sim0.9999$  (control vs channels),  $p=0.0024\sim0.9999$  (Non-targeting vs channels), n= 6 independent experiments,  $p=0.8051\sim0.9999$  (control vs channels)). Quantification of response onset time after CRISPR knockdown of (e) TRPM7 (n= 3, Unpaired T-test, two-tailed,  $p=0.6842$ ), (f) TRPP1 (n= 6 (control), 3 (TRPP1), Unpaired T-test, two-tailed,  $p=0.4057$ ), (g) TRPP2 (n= 6 (control), 5 (TRPP2), Unpaired T-test, two-tailed,  $p=0.6736$ ), (h) Piezo1 (n= 5 (control), 3 (Piezo1), Unpaired T-test, two-tailed,  $p=0.2059$ ), (i) TRPC1 (n= 5 (control), 6 (TRPC1), Unpaired T-test, two-tailed,  $p=0.1003$ ), (j) TRPM4 (n=6 (control), 7 (TRPM4), Unpaired T-test, two-tailed,  $p=0.2332$ ), and (k) after blocking T-type calcium channel (n= 5, Unpaired T-test, two-tailed,  $p=0.7296$ ). All values represent mean  $\pm$  SEM.

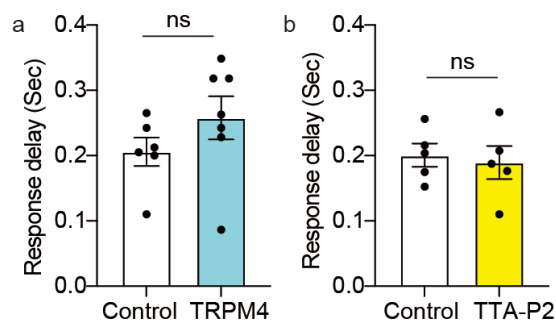

**Supplementary Figure 10 | Quantification of response onset time after CRISPR knockdown of (a) TRPM4 (n=6 (control), 7 (TRPM4), Unpaired T-test, two-tailed,  $p=0.2332$ ), and (b) after blocking T-type calcium channel (n= 5, Unpaired T-test, two-tailed,  $p=0.7296$ ). All values represent mean  $\pm$  SEM.**

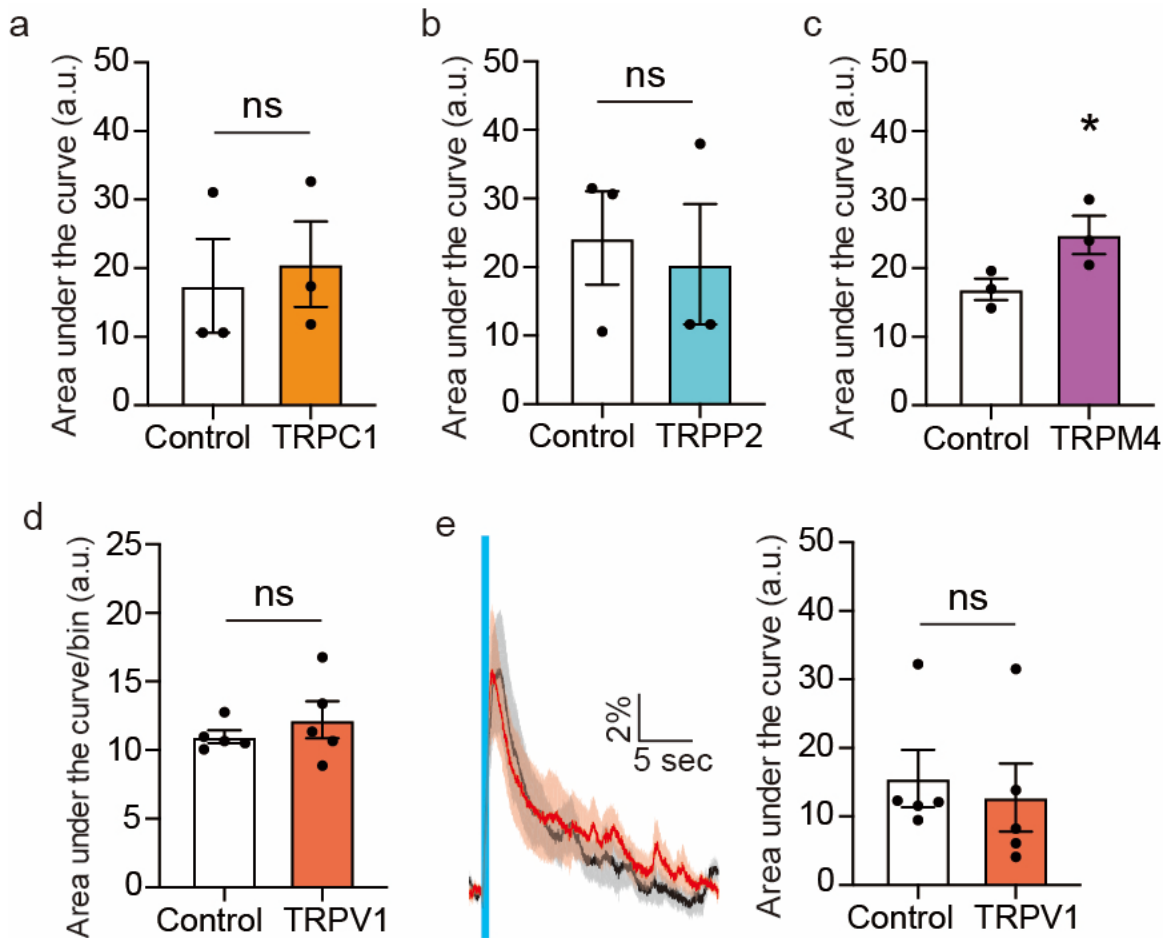

**Supplementary Figure 11 | Overexpression of mechanosensitive channels.** (a) Quantification of spontaneous activity after overexpressing TRPC1 (n= 3 independent experiments, Unpaired t-test, two-tailed,  $P=0.7491$ ), (b) TRPP2 (n= 3 independent experiments, Unpaired t-test, two-tailed,  $P=0.7473$ ), and (c) TRPM4 (n= 3 independent experiments, Unpaired t-test, two-tailed,  $P=0.0683$ ). (d) Quantification of spontaneous activity after overexpressing TRPV1 (n= 5 independent experiments, Unpaired t-test, two-tailed,  $P=0.4191$ ). (e) Calcium response to ultrasound after overexpressing TRPV1 (n= 5 independent experiments, Unpaired t-test, two-tailed,  $P=0.6801$ ). All values represent mean  $\pm$  SEM.

responses from GCaMP6f neurons to ultrasound stimulation. Ultrasound intensity at 15 W/cm<sup>2</sup> was applied for 500 ms 2 times with 20 sec inter-pulse interval.

**Supplementary Table 1. sgRNAs for CRISPR knockdown of mechanosensitive channels**

| <b>Target channel</b> | <b>sgRNA</b>          | <b>PCR primers for seq. (For/Rev)</b>        |
|-----------------------|-----------------------|----------------------------------------------|
| TRPM4                 | ACACAGTGGCCGGATCCGTG  | caatgtgtctccccattg/<br>gaaaccctgtcttaaaaaagc |
| TRPM7                 | TCCAGGGTAATCTCCCCCG   | gattgaactcaggactcc/<br>gatggatctctatgtgcc    |
| TRPP1                 | GAACTTGGCATAACGGCATCG | cattagctcaacacgctg/<br>gagtataccctacaaccac   |
| TRPP2                 | CCAATGTGTACTACTACT    | ccaccttgctacacattc/<br>cctgccatttagcactg     |
| Piezo1                | TGGGGCTGGAGTAGTTAGGG  | cttcagctaagcagatgag/<br>cttccaataattcctgacc  |
| TRPC1                 | TCTTACAGGTGGGCTTACGG  | cagagtggtagaacacttg/<br>ccacagtatgagaaggaatc |
| Scramble              | ACAACACGCCGACACGTCTA  |                                              |

**Supplementary Table 2. Predicted off target DNAs and their CFD score**

| <b>Target channel</b> | <b>sgRNA</b>             | <b>Off target DNA</b>   | <b>Chrm..</b> | <b>Position</b> | <b>Mismatching</b> | <b>CFD score</b> |
|-----------------------|--------------------------|-------------------------|---------------|-----------------|--------------------|------------------|
| TRPM4                 | ACACAGTGGCCGGATCCGTGNGG  |                         | n/a           |                 |                    |                  |
| TRPM7                 | TCCAGGGTAATCTCCCCCGNGG   |                         | n/a           |                 |                    |                  |
| TRPP1                 | GAACTTGGCATAACGGCATCGNGG | GAACTcGGCATAgGGCATcTAgG | chr7          | 58190249        | 3                  | 0.086776859      |
|                       |                          | GAACgTGcCATAACGGCATcTGG | chrX          | 7697030         | 3                  | 0.168791209      |
| TRPP2                 | CCAATGTGTACTACTACTNGG    | CaAATGaGTACcACTACTGGG   | chr8          | 86046724        | 3                  | 0.602870813      |
|                       |                          | gCtATGTGTcCTACTACTAGG   | chr7          | 129894326       | 3                  | 0.214833759      |
|                       |                          | CCAAaaTGTACTACaCACTGGG  | chr4          | 107776116       | 3                  | 0.289473684      |
|                       |                          | CCAATGTGTACTACcACcgTAGG | chr4          | 116068603       | 3                  | 0.006493506      |
|                       |                          | CaAATGTGTACTACctCACTTGG | chr5          | 122374594       | 3                  | 0.010017531      |
|                       |                          | CaAATGTaTACTACcCACTTGG  | chr5          | 133111346       | 3                  | 0.198347108      |
|                       |                          | gCAATGTGTACTACTACAagAGG | chr15         | 7216283         | 3                  | 0.069053708      |
|                       |                          | CCAATGTGTAAgTgCcCACTGGG | chr6          | 113238793       | 3                  | 0.13339921       |
|                       |                          | CCAcTGTGTACcgCTACTTGG   | chr14         | 102951205       | 3                  | 0.218064342      |
|                       |                          | CCAATGTGTACcACTACatgGGG | chr9          | 110447439       | 3                  | 0.077161229      |
|                       |                          | CCAtTGTGTAgTACTACAtTGGG | chrX          | 61766440        | 3                  | 0.07342657       |
|                       |                          | CCAcTtTGTACTACTACAtTTGG | chr11         | 25615191        | 3                  | 0.108597285      |
|                       |                          | CaAATGTGTACcACcCACTGGG  | chr11         | 65510726        | 3                  | 0.187907786      |
| CaAATGTGTgCTACTACTTGG | chr2                     | 6718054                 | 2             | 0.404040404     |                    |                  |
| <b>Piezo1</b>         | TGGGGCTGGAGTAGTTAGGGNGG  | TGGGGCaGGAGTAGgTgGGGTGG | chr8          | 38306807        | 3                  | 0.007720588      |
|                       |                          | TGGGGCaGGAGTAGgTAGGtGGG | chr12         | 37700661        | 3                  | 0.030625         |
|                       |                          | TGGGGCTGaAGTgGTaAGGGAGG | chr12         | 86241822        | 3                  | 0.381140599      |
|                       |                          | TGGGGagGGAGTAGTgAGGGAGG | chr3          | 84110027        | 3                  | 0.18907563       |
|                       |                          | TGGGGCTGGAGaAGcaAGGGTGG | chr7          | 109584451       | 3                  | 0.198347108      |
|                       |                          | TGGGGCaGGAGTAGgTAGGtGGG | chr7          | 120173029       | 3                  | 0.030625         |

|              |                         |                         |           |          |             |        |
|--------------|-------------------------|-------------------------|-----------|----------|-------------|--------|
|              | TGGGGgTGGAGTAaTcAGGGAGG | chr7                    | 139163261 | 3        | 0.25        |        |
|              | TGGGGCgGagGTAGTTAGGGTGG | chr1                    | 39664346  | 3        | 0.210084034 |        |
|              | TGGGGaaGGAGTAGTTAGGaTGG | chr15                   | 35582782  | 3        | 0.76171875  |        |
|              | TGaGGCTGGAGgAGaTAGGGAGG | chr15                   | 101772220 | 3        | 0.217105263 |        |
|              | TGGGGCTGGAGcAGTgAGGcAGG | chr17                   | 44247595  | 3        | 0.140543667 |        |
|              | TGaGGCTGGAGTAGgTgGGGGGG | chr10                   | 26559790  | 3        | 0.006617647 |        |
|              | TGGGGCTGGAGaAGTgAGGcAGG | chr6                    | 84393994  | 3        | 0.118681319 |        |
|              | TGGGGgTGGAGTtGgTAGGGTGG | chr6                    | 98682092  | 3        | 0.0075      |        |
|              | TGGGGCTGcAcTAGTgAGGGAGG | chr6                    | 110647213 | 3        | 0.079881657 |        |
|              | TGtGGCTGGAGTgGgTAGGGTGG | chr6                    | 123922209 | 3        | 0.016304348 |        |
|              | TGGGGCTGGAGTctTTAGaGAGG | chr14                   | 116081202 | 3        | 0.040100251 |        |
|              | TGGGGCTGGAGTgGgTAGGtGGG | chr9                    | 36602467  | 3        | 0.022826087 |        |
|              | TGGGGgTGGAGaAGTTgGGGGGG | chr18                   | 69502225  | 3        | 0.070588235 |        |
|              | TGGGGgTGGAGgAGTTgGGGTGG | chr11                   | 116447021 | 3        | 0.044117647 |        |
| <b>TRPC1</b> | TCTTACAGGTGGGCTTACGGNNG | TCTTcCAGGTGGGaTTACGtTGG | chr12     | 33176485 | 3           | 0.1225 |
|              | TCTTACAGcTGatCTTACGGAGG | chr3                    | 139139588 | 3        | 0.150769231 |        |
|              | TCTTACAGGTatGCTTACaGAGG | chr16                   | 59945876  | 3        | 0.274725275 |        |
|              | TCTaACAcGTGaGCTTACGGGGG | chr1                    | 189833763 | 3        | 0.273504273 |        |
