# Supplementary material for: Focused ultrasound excites cortical neurons via mechanosensitive calcium accumulation and ion channel amplification
Source: PubMed Central journal article supplement (PMC8789820; doi:10.1038/s41467-022-28040-1), 2022-01-25
Supplement: 41467_2022_28040_MOESM3_ESM.pdf [file 41467_2022_28040_MOESM3_ESM.pdf]

## Description of Additional Supplementary Files

Title: Supplementary Movie 1

Description: Real time imaging of calcium responses from GCaMP6f neurons to ultrasound stimulation. Ultrasound intensity at 15 W/cm<sup>2</sup> was applied for 500 ms 2 times with 20 sec inter-pulse interval.
